# Supplementary material for: Microporosity, pore anisotropy and surface properties of organized mesoporous silicates (OMSi) containing cobalt and cerium
Source: Royal Society of Chemistry journal article supplement (doi:10.1039/b616915e), 2007-01-01
Supplement: b616915e.pdf [file b616915e.pdf]

**Supplementary Information (i):**

**The t-plots for the samples studied. The estimated % microporosity is very small 1-3%**

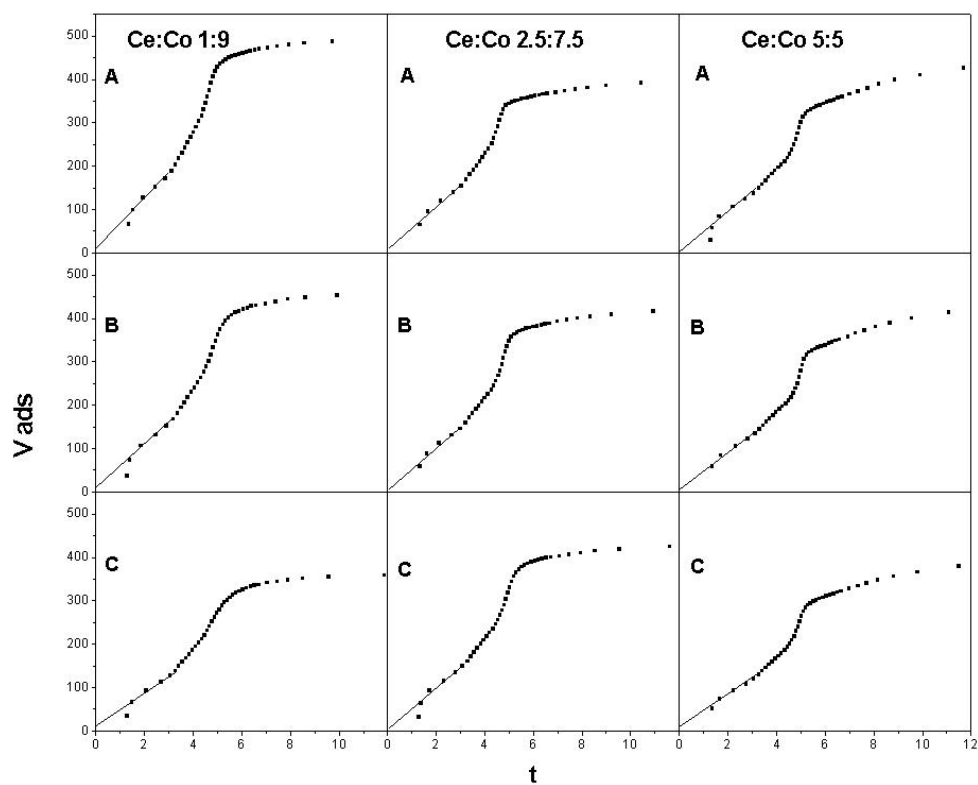

**Supplementary Information (ii)**

The I-plots for a typical mesoporous solid (MCM-41) and a microporous solid (zeolite Y). In the first case the Inversion point is quite sharp. In the second case is quite smooth.

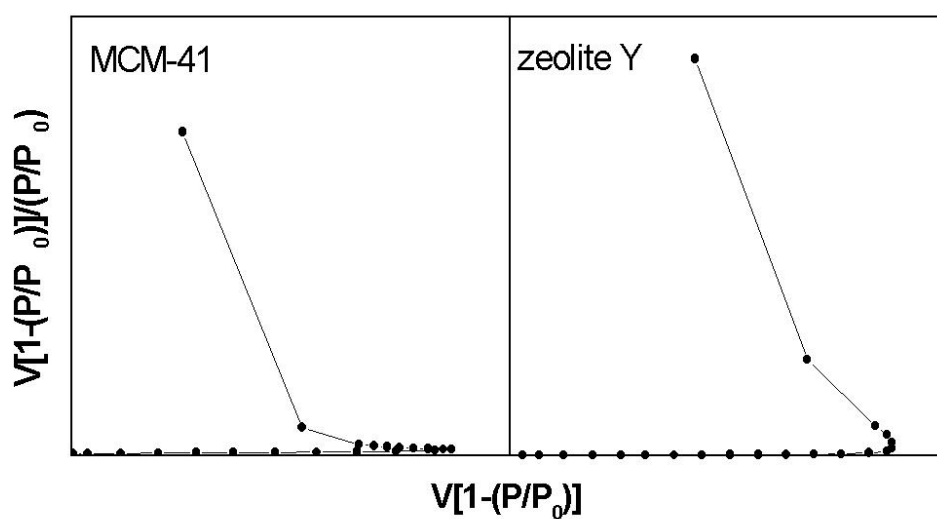

### **Supplementary Information (iii)**

**The estimation of pore anisotropy  $b$  can be done along the next steps [52, 46] based on nitrogen adsorption measurements.**

**Step i :** The anisotropy  $b_i$  for each group  $i$  of pores may be defined as

$$b_i = L_i / D_i = L_i / 2r_i \quad (\text{A1})$$

where  $L_i$ ,  $D_i$  and  $r_i$  are the length, the diameter and the radius of the group  $i$  of pores filled at a relative pressure  $P_i$  ( $=P_i/P_0$ ). Then the following relationship applies

$$L_i = D_i b_i = 2r_i b_i = r_i^{a_i} \quad (\text{A2})$$

where  $a_i$  is a very important scaling parameter to be determined

**Step ii :** At each particular pressure  $P_i$  ( $=P_i/P_0$ ) the differential specific surface area  $S_i$  as well as the differential specific pore volume  $V_i$  are estimated from nitrogen adsorption measurements via a standard algorithm, for example the BJH methodology<sup>29</sup>

**Step iii :** Then the dimensionless parameter  $S_i^3/V_i^2$  may be calculated, which for cylindrical pores takes the form

$$\begin{aligned} \frac{S_i^3}{V_i^2} &= \frac{[N_i(2\pi r_i)L_i]^3}{[N_i(\pi r_i^2)L_i]^2} = \frac{[N_i(2\pi r_i)(2r_i b_i)]^3}{[N_i(\pi r_i^2)(2r_i b_i)]^2} = 16\pi b_i N_i = \\ &= \frac{[N_i(2\pi r_i)(r_i)^{a_i}]^3}{[N_i(\pi r_i^2)(r_i)^{a_i}]^2} = 16\pi N_i \left( \frac{r_i^{a_i-1}}{2} \right) \end{aligned} \quad (\text{A3})$$

where  $N_i$ -the number of pores filled with  $N_2$  at each pressure  $P_i$  ( $=P_i/P_0$ ) having radius  $r_i$  and diameter  $D_i$ .

**Step iv :** The term

$$\lambda_i = \left( \frac{S_i^3}{16\pi V_i^2} \right) = N_i b_i \quad (\text{A4})$$

corresponds to the *total anisotropy*  $\lambda_i$  of the group  $N_i$  of the pores with anisotropy  $b_i$ . The equation (A4) in combination with equation (A3) after taking logarithms, obtains the form

$$\log(\lambda_i) = \log\left(\frac{N_i}{2}\right) + (a_i - 1) \log r_i \quad (\text{A5})$$

**Step v:** The slopes  $(a_i-1)$  in equation (A5) are calculated from the lines  $\log\lambda_i$  vs  $\log r_i$ . Then, the values of anisotropy  $b_i$  for each group  $i$  of pores are given by the simple relationship

$$b_i = 0.5 * r_i^{(a_i-1)} \quad (\text{A6})$$
